# Supplementary material for: Equilibrium and Kinetic Study of Lead and Copper Ion Adsorption on Chitosan-Grafted-Polyacrylic Acid Synthesized by Surface Initiated Atomic Transfer Polymerization
Source: PubMed Central journal article supplement (PMC6225132; doi:10.3390/molecules23092218), 2018-09-01
Supplement: molecules-23-02218-s001.pdf [file molecules-23-02218-s001.pdf]

**Table S1.** Theoretical Isothermal fitting experimental results.

| Isothermal Model | Adsorbent      | Metal ion        | Parameter (unit) | Value |
|------------------|----------------|------------------|------------------|-------|
| Freundlich       | CS             | Cu <sup>2+</sup> | n                | 2.5   |
|                  |                |                  | k                | 7.1   |
|                  |                |                  | R <sup>2</sup>   | 0.867 |
|                  |                |                  | ARE              | 13.9  |
|                  |                | Pb <sup>2+</sup> | n                | 2.4   |
|                  |                |                  | k                | 4.1   |
|                  | R <sup>2</sup> |                  | 0.851            |       |
|                  | ARE            |                  | 13.9             |       |
|                  | CS-g-TA        | Cu <sup>2+</sup> | n                | 2.4   |
|                  |                |                  | k                | 7.0   |
|                  |                |                  | R <sup>2</sup>   | 0.891 |
|                  |                |                  | ARE              | 15.2  |
| Pb <sup>2+</sup> |                | n                | 2.4              |       |
|                  |                | k                | 5.2              |       |
|                  | R <sup>2</sup> | 0.88             |                  |       |
|                  | ARE            | 12.6             |                  |       |
| Temkin           | CS             | Cu <sup>2+</sup> | A                | 2.3   |
|                  |                |                  | B                | 25    |
|                  |                |                  | R <sup>2</sup>   | 0.978 |
|                  |                |                  | ARE              | 3.7%  |
|                  |                | Pb <sup>2+</sup> | A                | 2.5   |
|                  |                |                  | B                | 9.7   |
|                  | R <sup>2</sup> |                  | 0.985            |       |
|                  | ARE            |                  | 4-0%             |       |
|                  | CS-g-TA        | Cu <sup>2+</sup> | A                | 2.0   |
|                  |                |                  | B                | 26    |
|                  |                |                  | R <sup>2</sup>   | 0.979 |
|                  |                |                  | ARE              | 5.1%  |
| Pb <sup>2+</sup> |                | A                | 2.6              |       |
|                  |                | B                | 15.2             |       |
|                  | R <sup>2</sup> | 0.990            |                  |       |
|                  | ARE            | 4.7%             |                  |       |

<sup>1</sup> fitting coefficient.
